# Supplementary material
Source: PubMed Central journal article supplement (PMC6743722)
Supplement: NIHMS1049474-supplement-Appendix_1.pdf [file NIHMS1049474-supplement-Appendix_1.pdf]

## Acknowledgements

Development of the revised and updated CDC Worksite Health ScoreCard was made possible through the time and expertise provided by those who participated in the Stakeholder Interviews and the Subject Matter Expert panel discussions. We are grateful to all the individuals listed below.

### Stakeholder Interviewee List

| Name                         | Professional Affiliation                                                                                                      |
|------------------------------|-------------------------------------------------------------------------------------------------------------------------------|
| Chris Calitz, MPP            | Director of Health Programs and Evaluation at the American Heart Association                                                  |
| Nicole Morris, MSN           | Regional Lead for Healthiest Maryland Businesses at the Maryland Department of Mental Health and Mental Hygiene               |
| Bonnie Sakallaris, PhD, RN   | Vice President of Optimal Health Environments at the Samueli Institute                                                        |
| Andy Goodman, MD, MPH        | Advisor to the 1199 workers health union in New York and Clinical Professor at the NYU College of Global Public Health.       |
| Ryan Picarella, MS, SPHR     | President of the Wellness Council of America (WELCOA)                                                                         |
| Jessica Grossmeier, PhD, MPH | Vice President of Research at the Health Enhancement Research Organization (HERO)                                             |
| Laura Linnan, ScD, MEd       | Director, Carolina Collaborative for Research on Work and Health and Professor at UNC Gillings School of Global Public Health |
| Karen Marlo, MPP             | Vice President of the National Business Group on Health (NBGH)                                                                |

**Subject Matter Expert Panel Members****CDC Subject Matter Experts**

|                 |                 |                 |              |
|-----------------|-----------------|-----------------|--------------|
| Pam Allweiss    | Casey Chosewood | Andy Lanza      | Sharada      |
| Carma Ayala     | Daurice         | Carol MacGowan  | Shantharam   |
| Stephen Babb    | Grossniklaus    | Jessica Mesnick | Sheri Stuart |
| Brook Belay     | Tamera Haegrich | Greta Messett   | Anne Wheaton |
| Jemika Blackman | Ahmed Jamal     | Qaiser Mukhtar  | Mary White   |
| Terry Brady     | David Kim       | Stephen Onufrak |              |
| Claire Caruso   | Joel Kimmons    | Steven Sauter   |              |
| Chia-Chia Chang | Tina Lankford   | Anita Schill    |              |

**Subject Matter Experts**

|                                                                                                              |                                                                                                        |
|--------------------------------------------------------------------------------------------------------------|--------------------------------------------------------------------------------------------------------|
| Laurie Whitsel— American Heart Association                                                                   | Ron Manderscheid—National Association of County Behavioral Health & Developmental Disability Directors |
| Chris Calitz—American Heart Association                                                                      | LuAnn Heinen— National Business Group on Health                                                        |
| Charles Yarborough—CY Health Associates                                                                      | Seth Serxner—Optum                                                                                     |
| Thomas Bender—Dow                                                                                            | Joel Bennett—Organizational Wellness                                                                   |
| Cathy Baase—Dow                                                                                              | Andrew Creighton—Prudential                                                                            |
| Ann Rogers—Emory University                                                                                  | Deborah Galvin—Substance Abuse and Mental Health Services Administration                               |
| Allen Frommelt—Envolve Health                                                                                | Michael Dansinger—Tufts Medical Center                                                                 |
| Eric Goplerud—George Washington University                                                                   | Debra Lerner—Tufts University                                                                          |
| Walter Willett—Harvard University                                                                            | Larry Webber—Tulane University                                                                         |
| Laura Barger—Harvard University                                                                              | Ron Loeppke—U.S. Preventative Medicine                                                                 |
| Glorian Sorenson—Harvard University                                                                          | Steve Schroeder—University of California San Francisco                                                 |
| Angie Blair—Healthiest Maryland Businesses                                                                   | Vineet Arora—University of Chicago                                                                     |
| Tara Snyder—Healthiest Maryland Businesses, Previously with Maryland Department of Health and Mental Hygiene | Dave DeJoy—University of Georgia                                                                       |
| Paul Terry—Health Enhancement Research Organization (HERO)                                                   | LaVaughn Palma-Davis—University of Michigan                                                            |
| Joanna Cohen—Johns Hopkins University                                                                        | Daniel Patterson—University of Pittsburgh Medical Center                                               |
| David Jernigan—Johns Hopkins University                                                                      | Diana Fernandez—University of Rochester                                                                |
| Larry Cheskin—Johns Hopkins University                                                                       | Jeff Harris—University of Washington                                                                   |
| Susan Gross—Johns Hopkins University                                                                         | Tamara Osgood—U.S. Army                                                                                |
| Jeanne Clark—Johns Hopkins University                                                                        | David Katz—Yale University                                                                             |
| Jennifer Flynn—Johnson and Johnson                                                                           |                                                                                                        |
| Steven Noeldner—Mercer                                                                                       |                                                                                                        |
